# Supplementary material for: Promoting the photocatalytic conversion of carbon dioxide to methanol on molybdenum dioxide using sodium species
Source: Royal Society of Chemistry journal article supplement (doi:10.1039/d4tc04541f), 2025-01-01
Supplement: d4tc04541f1.pdf [file d4tc04541f1.pdf]

## Supporting Information

Promoting Photocatalytic Conversion of Carbon Dioxide to Methanol of Molybdenum  
Dioxide by Sodium Species

Zekun Wang<sup>1#</sup>, Zhi Chen<sup>2#</sup>, Kai Huang<sup>3</sup>, Chengyu Lu<sup>2</sup>, Chunli Wang<sup>2</sup>, Yuting Ma<sup>2</sup>,  
Jianjun Chen<sup>4</sup>, Yishan Liu<sup>5</sup>, Jiemin Wang<sup>6\*</sup>, Jinxing Mi<sup>4\*</sup>, Liangzhu Zhang<sup>2\*</sup>

1 College of Materials and Chemistry & Chemical Engineering, Chengdu University of  
Technology, Chengdu, 610059, China.

2 School of Materials Science and Engineering, East China University of Science and  
Technology, Shanghai, 200237, China

3 School of Pharmaceutical and Chemical Engineering, Taizhou University, Taizhou,  
Zhejiang, 318000, P. R. China

4 State Key Joint Laboratory of Environment Simulation and Pollution Control, School  
of Environment, Tsinghua University, Beijing 100084, China

5 College of Mathematics, Sichuan University, Chengdu, 610064, China.

6 College of Biomedical Engineering, Sichuan University, Chengdu, 610064, China.

a

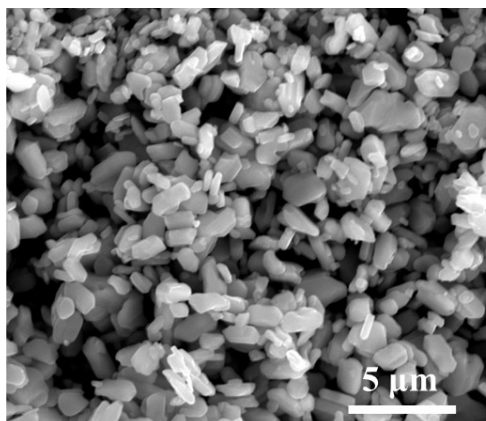

b

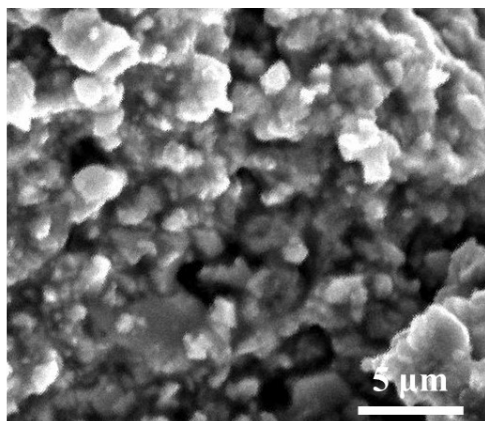

**Figure S1.** SEM image of (a) MoO<sub>3</sub>, (b)Na/MoO<sub>2</sub>.

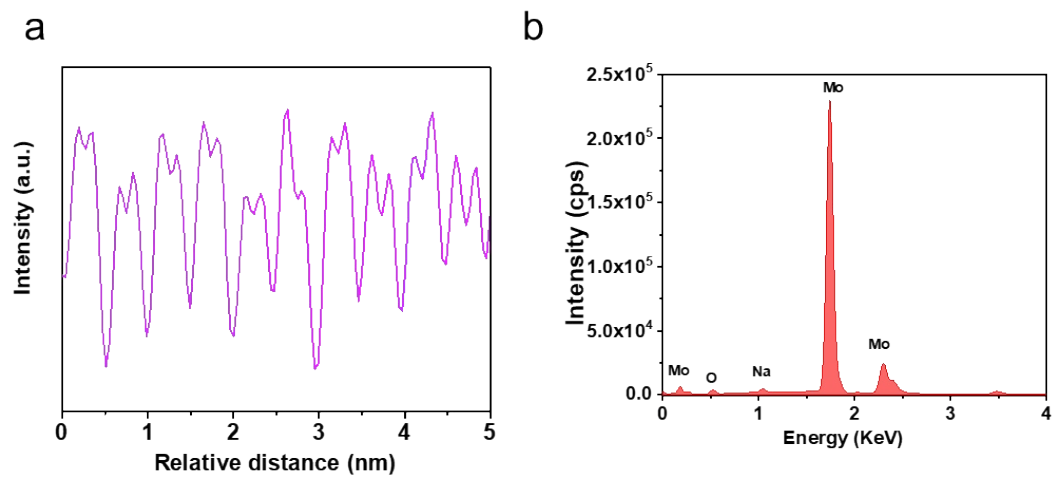

**Figure S2.** (a) height profile of marked line in Figure 1a. (b) EDS spectra of Na/MoO<sub>2</sub>.

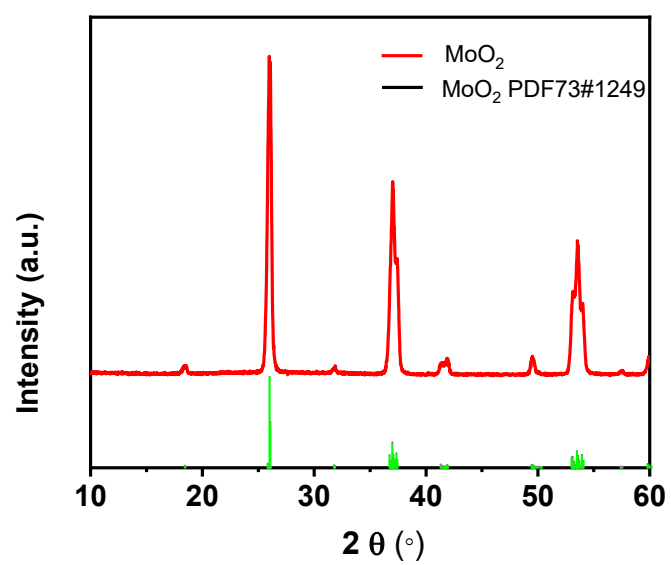

**Figure S3.** XRD profile of MoO<sub>2</sub>.

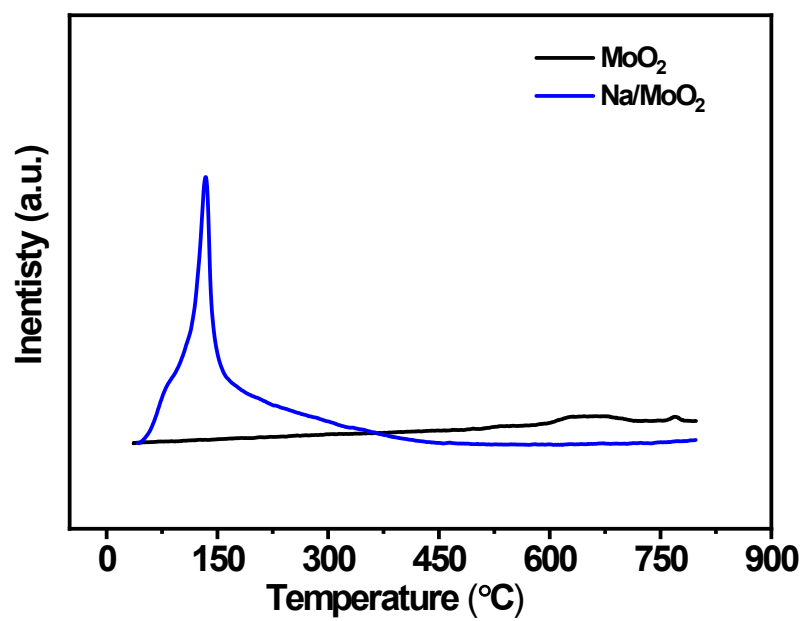

**Figure S4.** CO<sub>2</sub>-TPD curves of MoO<sub>2</sub> and Na/MoO<sub>2</sub>.

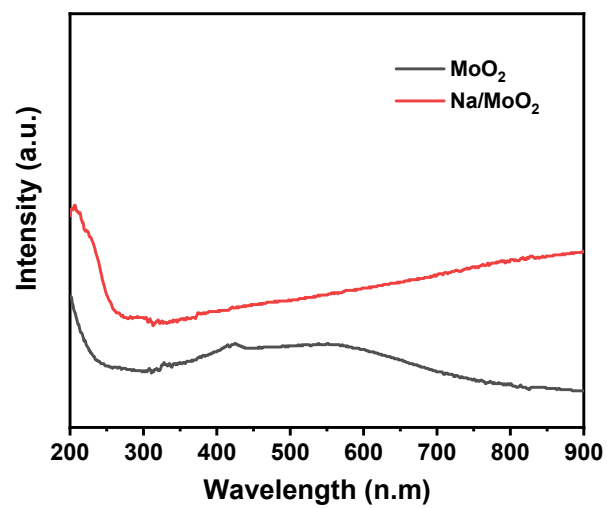

**Figure S5.** UV-vis diffuse reflectance spectra of MoO<sub>2</sub> and Na/MoO<sub>2</sub> sample.

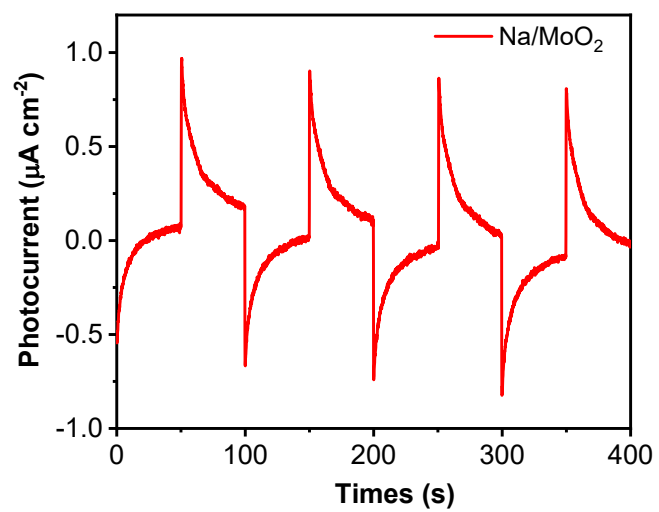

**Figure S6.** Time-dependent photocurrent curves (i-t curve) Na/MoO<sub>2</sub>.

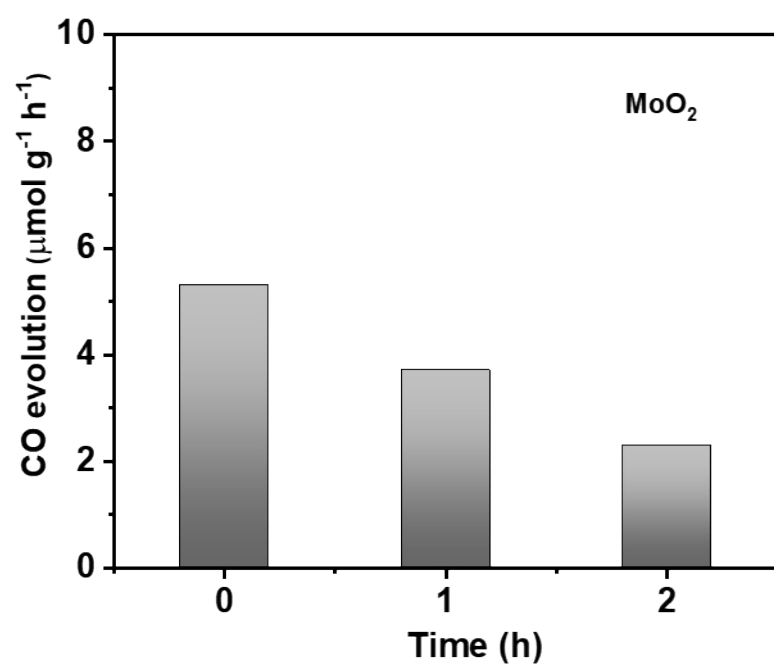

Figure S7. CO production over MoO<sub>2</sub> for 2 h.



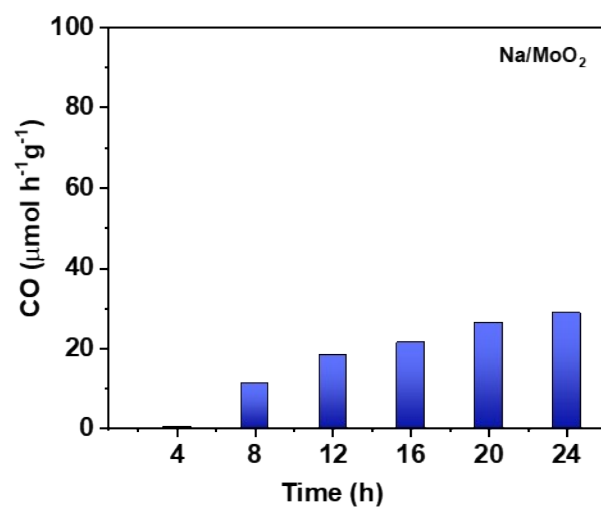

**Figure S8.** (a) CO production over Na/MoO<sub>2</sub> for 24 h.

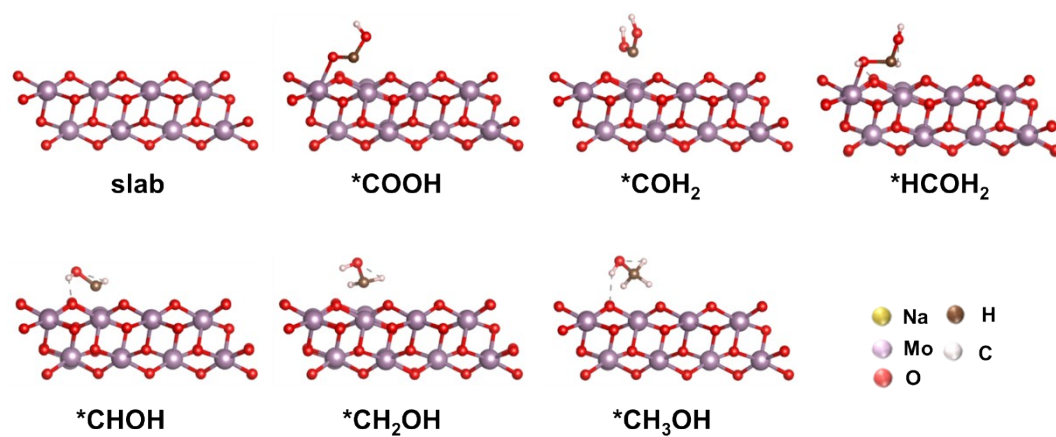

**Figure S9.** Structure model of adsorption intermediates on MoO<sub>2</sub> for every reaction step in CO<sub>2</sub> photocatalytic converting into CH<sub>3</sub>OH.
